# Supplementary material
Source: PubMed Central journal article supplement (PMC4754962)
Supplement: NIHMS650669-supplement-supplement_1.pdf [file NIHMS650669-supplement-supplement_1.pdf]

## Accepted Manuscript

Colonization of the upper genital tract by vaginal bacterial species in non-pregnant women

Caroline M. Mitchell MD MPH, Anoria Haick MS, Evangelyn Nkwopara BA, Rochelle Garcia MD, Mara Rendi MD PhD, Kathy Agnew BA, David N. Fredricks MD, David Eschenbach MD

PII: S0002-9378(14)02438-7  
DOI: [doi:10.1016/j.ajog.2014.11.043](https://doi.org/10.1016/j.ajog.2014.11.043)  
Reference: YMOB 10172

Published in: *American Journal of Obstetrics and Gynecology*

Received date: 1 October 2014  
Revised date: 6 November 2014  
Accepted date: 24 November 2014

Cite this article as: Mitchell CM, Haick A, Nkwopara E, Garcia R, Rendi M, Agnew K, Fredricks DN, Eschenbach D, Colonization of the upper genital tract by vaginal bacterial species in non-pregnant women, *American Journal of Obstetrics and Gynecology*, doi:[10.1016/j.ajog.2014.11.043](https://doi.org/10.1016/j.ajog.2014.11.043)

This is a PDF file of an unedited manuscript that has been accepted for publication. As a service to our customers we are providing this early version of the manuscript. The manuscript will undergo copyediting, typesetting, and review of the resulting proof before it is published in its final citable form. Please note that during the production process errors may be discovered which could affect the content, and all legal disclaimers that apply to the journal pertain.

1 Title: Colonization of the upper genital tract by vaginal bacterial species in non-pregnant  
2 women

3

4 Caroline M. MITCHELL, MD MPH<sup>1\*</sup>, Anoria HAICK, MS<sup>1</sup>, Evangelyn NKWOPARA, BA<sup>1</sup>,  
5 Rochelle GARCIA, MD<sup>2</sup>, Mara RENDI, MD PhD<sup>2</sup>, Kathy AGNEW, BA<sup>1</sup>, David N.  
6 FREDRICKS, MD<sup>3</sup>, David ESCHENBACH, MD<sup>1</sup>

7

8 This study was conducted in Seattle, WA.

9

10 University of Washington Departments of <sup>1</sup>Obstetrics & Gynecology, and <sup>2</sup>Pathology  
11 <sup>3</sup>Fred Hutchinson Cancer Research Center, Vaccine and Infectious Diseases Division

12 \* Dr. Mitchell has since moved to the Vincent Center for Reproductive Biology,  
13 Massachusetts General Hospital

14

15 The authors report no conflicts of interest.

16

17 These findings were presented in part at the Annual Meeting of the Infectious Diseases  
18 Society of Obstetrics & Gynecology in Whistler, British Columbia, August 9-11 2012

19

20 **Funding:** This work was supported by a K08 from NIAID (1K08AI087969 – 01;CM) and  
21 by a grant from the University of Washington Royalty Research Fund (CM). Neither  
22 funding source had any role in collection, analysis, presentation or decision to publish  
23 the data.

24

25 Reprints will not be available

26 Corresponding author: Caroline Mitchell

27 Vincent Center for Reproductive Biology

28 Massachusetts General Hospital

29 55 Fruit St, Their 9

30 Boston, MA 02114

31 Phone: 617-724-6047

32 Fax: 617-726-0561

33 [caroline.mitchell@mgh.harvard.edu](mailto:caroline.mitchell@mgh.harvard.edu)

34

35

36

37

38

39 Abstract: 250 words

40 Manuscript: 3149 words

41

42

43

44

45

46

47 **Condensation:** Ninety-five percent of women undergoing hysterectomy had bacteria  
48 detected in the upper genital tract using molecular diagnostic tests.

49 **Running title:** Intrauterine bacterial colonization

50

51

52

53

54

55

56

57

58

59

60

61

62

63

64

65

66

67

68

69

70 **Objective:** Evaluate upper genital tract (UGT) presence of vaginal bacterial species  
71 using sensitive molecular methods capable of detecting fastidious bacterial vaginosis  
72 (BV)-associated bacteria.

73  
74 **Study Design:** Vaginal swabs were collected prior to hysterectomy. The excised  
75 uterus was sterilely opened and swabs collected from endometrium and upper  
76 endocervix. DNA was tested in 11 quantitative PCR (qPCR) assays for 12 bacterial  
77 species: *Lactobacillus iners*, *L. crispatus*, *L. jensenii*, *Gardnerella vaginalis*, *Atopobium*  
78 *vaginae*, *Megasphaera spp.*, *Prevotella spp.*, *Leptotrichia/Sneathia*, BVAB1, BVAB2,  
79 BVAB3 and a broad-range 16S rRNA gene assay. Endometrial fluid was tested with  
80 Luminex and ELISA for cytokines and defensins, and tissue for gene expression of  
81 defensins and cathelicidin.

82  
83 **Results:** We enrolled 58 women: mean age  $43 \pm 7$  years, mostly white (n = 46; 79%)  
84 and BV-negative (n = 43; 74%). By species-specific qPCR, 55 (95%) had UGT  
85 colonization with at least one species (n = 52), or were positive by 16S PCR (n = 3).  
86 The most common species were *L. iners* (45% UGT, 61% vagina), *Prevotella spp.* (33%  
87 UGT, 76% vagina) and *L. crispatus* (33% UGT, 56% vagina). Median quantities of  
88 bacteria in the UGT were lower than vaginal levels by 2-4  $\log_{10}$  rRNA gene copies/swab.  
89 There were no differences in endometrial inflammatory markers between women with  
90 no bacteria, *Lactobacillus* only or any BV-associated species in the UGT.

91

92 **Conclusion:** Our data suggest that the endometrial cavity is not sterile in most women  
93 undergoing hysterectomy, and that the presence of low levels of bacteria in the uterus is  
94 not associated with significant inflammation.

95

96 **Key words:** Intrauterine bacteria; endometritis; upper genital tract infection;  
97 reproductive tract microbiota; uterine cavity; endometrium; sterile

98

99

100

101

102

103

104

105

106

107

108

109

110

111

112

113

114

115 **Introduction:**

116 Bacterial colonization of the uterus is associated with adverse reproductive health  
117 outcomes, including preterm delivery and chorioamnionitis,<sup>1</sup> pelvic inflammatory disease  
118 and endometritis<sup>2,3</sup> and miscarriage.<sup>4</sup> Upper genital tract infection has been presumed  
119 to be due to pathologic ascent of vaginal bacteria in to the upper genital tract. The  
120 physical barrier of cervical mucous, its high concentrations of antimicrobial peptides and  
121 inflammatory cytokines,<sup>5-9</sup> and possibly immunoglobulins<sup>10</sup> or matrix degrading enzymes  
122 <sup>11</sup> in the mucous plug are thought to provide a defense against bacterial ascent and the  
123 uterine cavity of healthy women has long been considered sterile.

124

125 However, radioactively labeled albumin spheres placed in the vagina ascend into the  
126 uterus as early as 2 minutes after instillation,<sup>12</sup> suggesting that fluid and particles move  
127 between the vagina and uterus relatively freely. Studies of ostensibly healthy women  
128 report a variable rate of uterine bacterial colonization by culture, ranging from 0-82%.<sup>13-</sup>  
129 <sup>22</sup> This wide range is due in part to differences in sample collection: studies using  
130 hysterectomy or transfundal sampling had lower rates (0-24%)<sup>13-16,22</sup> compared to  
131 those using transcervical sampling (33-82%).<sup>17,18,21</sup>

132

133 Many studies using molecular characterization of the microbiota have demonstrated the  
134 ubiquitous presence of bacteria throughout the body, and their influence on health.<sup>23,24</sup>

135 We hypothesized that bacterial colonization of the upper genital tract may be quite  
136 common and not pathologic in many cases. We undertook this study to assess the  
137 prevalence and concentrations of bacteria in the upper genital tract (UGT) using

138 sensitive molecular methods in sterilely sampled hysterectomy specimens.  
139 Additionally, we measured the endometrial immune response to determine whether  
140 intrauterine bacterial colonization was associated with epithelial inflammation, which  
141 could suggest an adverse effect of the bacteria.

142

### 143 **Materials & Methods:**

144 *Study cohort and sample collection:* Women undergoing hysterectomy for non-cancer  
145 indications were eligible. Exclusion criteria included presence of an IUD, use of  
146 antibiotics, endometrial biopsy, IUD removal or hysteroscopy in the past 30 days, or  
147 concern for cervical or endometrial neoplasia. Total laparoscopic or laparoscopically-  
148 assisted vaginal hysterectomy specimens were only collected if the surgeon was able to  
149 complete the procedure using a non-invasive vaginal fornix delineator (Colpo-Probe,  
150 Cooper Surgical, Trumbull, CT) or a vaginal sponge stick rather than an intracervical  
151 manipulator. The University of Washington Human Subjects Division approved the  
152 study. All subjects signed informed consent. All patients received standard pre-  
153 operative antibiotic prophylaxis at least 30 minutes prior to surgery.

154

155 Prior to vaginal exams or prep, flocked swabs (Copan Diagnostics Inc., Murrieta, CA)  
156 were inserted 3-4cm into the vagina for 5 seconds. One was smeared on a glass slide  
157 for Gram stain and Nugent scoring.<sup>25</sup> The uterus was removed, wrapped in a sterile  
158 towel, taken to pathology without fixation and incised sagittally under sterile conditions,  
159 beginning at the fundus. Swabs were collected first from the endometrium and then  
160 from the upper endocervix by rolling the swab 2-3 times across the epithelium and



161 frozen at -80°C. In a subset of participants (n = 30, 52%) swabs were collected in the  
162 Port-A-Cul anaerobic system (Beckton, Dickinson and Company, Franklin Lakes, NJ),  
163 cultured in standard fashion, including selective broth to allow growth of mycoplasma  
164 species and isolates identified by routine biochemical methods. Tissue sections were  
165 collected from the endometrium contralateral to the swab collection, cut into 1 x 1 cm  
166 blocks, placed in RNALater at 4°C for 24 hours, then placed at -80°C.

167  
168 *Bacterial PCR assays:* Frozen swabs were thawed and 400 uL of PBS added, mixed by  
169 vortex shaker for 1 minute, then the swab removed and the sample spun at 17,000 x g  
170 for ten minutes (all at 4 degrees). The pellet underwent DNA extraction with the MoBio  
171 Bacteremia DNA Isolation Kit (MoBio, Carlsbad, CA), while the supernatant was  
172 aliquoted and frozen for Luminex analysis. DNA underwent taxon-directed 16S rRNA  
173 gene TaqMan format qPCR assays for the following bacterial species: *Lactobacillus*  
174 *crispatus*, *L. jensenii*, *L. iners*, *Gardnerella vaginalis*, *Atopobium vaginae*, *Megasphaera*  
175 *genus*, *Prevotella* genus, Bacterial Vaginosis Associated Bacterium 1 (BVAB1), BVAB2,  
176 BVAB3 and an assay detecting two closely related bacteria (*Leptotrichia* and  
177 *Sneathia*).<sup>26 27</sup> For the *Prevotella* genus assay, the forward primer 384F (5' - GC CTG  
178 AAC CAG CCA AGT A – 3'), reverse primer 513R (5' - GGA ATT AGC CGG TCC TTA  
179 TT - 3') and a taxon-specific probe (6FAM - GTG CAG GAI GAC GGC C – MGBNFQ)  
180 were used. The thermocycler (ABI 7500 Thermocycler, Applied Biosystems, Foster  
181 City, CA) program was 2 minutes 50°C, 10 minutes 95°C, and then 45 cycles of 15  
182 seconds 95°C, 39 seconds 59°C and 30 seconds 72°C. UGT swabs were also tested  
183 using a broad-range 16S rRNA gene assay to assess for the presence of any bacteria.

184 Limits of detection for the assays were as follows: *L. crispatus* 75 gene copies/swab, *L.*  
185 *jensenii* 125 gene copies/ swab, all other species-specific assays 150 gene  
186 copies/swab, and broad-range 16S 6,400 gene copies/swab.<sup>28</sup> Negative assays were  
187 assigned a value of half the lower limit of detection for that assay.

188

189 *Measurement of cytokines, chemokines and antimicrobial peptides:* Supernatant from  
190 endometrial swabs was submitted for Luminex (Luminex Corporation, Austin, TX)  
191 analysis. Seven of the 14 analytes (IL4, IL10, IL17, IFN- $\gamma$ , IFN $\alpha$ , TNF $\alpha$ , MIP1 $\alpha$ ) were  
192 undetectable in over 95% of samples and were not included in the final analysis. ELISA  
193 for human beta defensin 2 (HBD2), HBD3 (Alpha Diagnostics International, San  
194 Antonio, TX) and human alpha defensins 1-3 (HNP 1-3; Hycult Biotech, Plymouth  
195 Meeting, PA) was performed. Homogenized endometrial tissue sections underwent  
196 RNA extraction using the RNEasy Fibrous Tissue Kit (Qiagen Inc., Valencia, CA). RNA  
197 was reverse transcribed using iScript cDNA synthesis kit (Bio-Rad Laboratories,  
198 Waltham, MA) and amplified using primers and probes from Applied Biosystems (Foster  
199 City, California) for HBD2, HBD3, cathelicidin (CAMP) and IL1 $\beta$ , as well as the  
200 housekeeping gene  $\beta$ -actin.

201

202 *Statistical analysis:* All analysis was performed using Stata v.10. Prevalences were  
203 compared between groups using the chi square test. Quantities of bacteria and  
204 concentrations of cytokines were not normally distributed, so were compared across  
205 groups using Wilcoxon rank-sum or Kruskal Wallis tests.

206

207 **Results:**

208 *Cohort:* We enrolled 58 women with mean age of  $43 \pm 7$  years. Participants were  
209 primarily white (n = 46; 79%), with a small proportion of African American (n = 6; 10%)  
210 and Hispanic (n = 4; 7%) women (2 declined to answer the question). All underwent  
211 hysterectomy for benign disease: primarily bleeding (n = 20; 34%), fibroids (n = 15;  
212 26%), pain (n = 17; 29%). Most had a normal Nugent score (n = 43; 74%), while 6  
213 (10%) had bacterial vaginosis, 7 (12%) had an intermediate score and 2 (3%) could not  
214 be scored. Most (37; 64%) were on no hormonal medications, 5 (9%) were taking oral  
215 contraceptives, 13 (22%) were using Lupron, and 2 (3%) were using a different  
216 hormonal medication (testosterone, hormone replacement therapy). Eight women  
217 (14%) reported being menopausal. Only 37/50 (74%) pre-menopausal women provided  
218 information about last menstrual period (LMP). The median number of days since LMP  
219 was 28 (IQR 12, 64), and of the 24 women reporting < 40 days since their LMP only 8  
220 (33%) were in the first 14 days of their cycle. Most women had never douched (n = 32;  
221 55%) or douched more than 1 week prior to surgery (n = 10; 17%), with a minority who  
222 had douched within the past week (n = 2; 3%) and 14 (24%) who did not answer the  
223 question. Nineteen women (33%) reported sexual intercourse in the week prior to  
224 surgery.

225  
226 *UGT colonization:* By species-specific qPCR, 55 (95%) of women had UGT colonization  
227 (i.e. in the endometrium or upper endocervix) with at least one of the assayed species  
228 (n = 52), or were positive by broad range 16S PCR (n = 3). The most commonly  
229 detected species in the vagina were *Prevotella* spp. (76%) *L. iners* (61%), and *L.*

230 *crispatus* (56%). These were also the most commonly detected species in the UGT: *L.*  
231 *iners* (45%), *Prevotella* spp. (33%) and *L. crispatus* (33%)(Figure 1a). *G. vaginalis*, *A.*  
232 *vaginae* and *L. jensenii*, were detected in the vagina in over 40% of women, but were  
233 detected less frequently in the UGT (in 19%, 10% and 20%, of women). Mean  
234 quantities of bacteria detected in the UGT were lower than levels in the vagina by 2-4  
235  $\log_{10}$  rRNA gene copies (Figure 1b). When detected in the vagina, *A. vaginae* was the  
236 least likely species to also be detected in the UGT, while BVAB1 and *L. iners* were the  
237 most likely (Figure 1c). The mean vaginal quantity of *L. crispatus* and *G. vaginalis* was  
238 significantly higher in women who had UGT colonization with those species:  $7.7 \pm 1$  vs.  
239  $5.5 \pm 2.5$  gene copies/swab for *L. crispatus* ( $p = 0.006$ ) and  $7.8 \pm 1.2$  vs.  $4.9 \pm 1.5$  gene  
240 copies/swab for *G. vaginalis* ( $p < 0.001$ ). There were no significant differences in  
241 vaginal quantity between women with and without UGT colonization with other bacteria  
242 (data not shown). The median number of species detected in the UGT was 2 (IQR 1,3;  
243 range 0-8), while the median number of species detected in the vagina was 3 (IQR 2,5;  
244 range 0-9). There was no correlation between number of species detected in the  
245 vagina and the UGT (correlation coefficient 0.21,  $p = 0.12$ ). Of note, in several cases an  
246 organism present in the UGT was not present in the vagina (Figure 2).

247  
248 As almost all women had at least one species detected in the UGT we were unable to  
249 evaluate risk factors for colonization in general. We divided women into those with no  
250 bacteria detected in the UGT ( $n = 3$ ), *Lactobacillus* species only ( $n = 18$ ; 31%), any non-  
251 *Lactobacillus* species ( $n = 34$ ; 59%), 16S positive only ( $n = 3$ ). The only demographic  
252 difference between these groups was race: UGT colonization with a non-*Lactobacillus*

253 species was more common in African American women (5/6; 83%) and Hispanic  
254 women (3/4; 75%) than white women (25/46; 54%)( $p = 0.01$ ). Rates of BV were slightly  
255 different between these groups: 17% for African American, 0% for Hispanic and 11% for  
256 white women. There was a trend to increasing UGT colonization by non-*Lactobacillus*  
257 species with increasing Nugent score: with Nugent score 0-3 the rate was 51% (22/43),  
258 score of 4-6 71% (5/7) and score 7-10 83% (5/6) ( $p = 0.24$ ). However, the six women  
259 with the highest levels of non-*Lactobacillus* species detected in the UGT all had a  
260 Nugent score  $< 7$ . Age, menopausal status, treatment with GnRH agonist, gravidity,  
261 parity, douching or sex in the past week were not significantly different between the  
262 groups. (data not shown)

263

264 Of the subset of 30 women who also had cultures performed of upper genital tract  
265 swabs, 28 (93%) had bacteria detected by qPCR, and 26/30 (87%) had bacteria  
266 detected by culture. Both women with negative qPCR results were also negative by  
267 culture. The most commonly cultured organisms were *Diphtheroids* ( $n = 15$ ; 50%),  
268 followed by anaerobic gram-positive cocci (12; 40%), *Propionibacterium* spp. ( $n = 9$ ;  
269 30%) and *Lactobacillus* species ( $n = 8$  species from 5 women; 17%) (Supplementary  
270 Table 1).

271

272 *Immune response*: Soluble markers of inflammation were measured from endometrial  
273 swabs by Luminex, antimicrobial peptides by ELISA, and gene expression for  
274 defensins, cathelicidin and IL1 $\beta$  from tissue RNA and results compared between women  
275 with no bacteria, only *Lactobacillus* species or any non-*Lactobacillus* species detected

276 in the upper genital tract. (Figure 3) There were no significant differences in the median  
277 values of these markers between groups. However, the lowest quantities of beta-  
278 defensin proteins seemed to be samples from women with non-*Lactobacillus* species in  
279 the UGT. The one woman with high (> 100,000 gene copies/swab) of *L. iners* in the  
280 UGT had relatively high levels of several inflammatory markers – but the lowest levels  
281 of gene expression for the beta defensins, cathelicidin and IL1 $\beta$ . When compared  
282 between women who had surgery for fibroids, bleeding, pain or other reasons, the only  
283 analyte that was significantly different between the groups was IL6: median 6 pg/mL  
284 (Interquartile Range (IQR) 1, 28) in women having surgery for fibroids, 21.9 pg/mL (IQR  
285 9,154) in women having surgery for bleeding, 32 pg/mL (IQR 14, 323) in women having  
286 surgery for pain, and 1 (IQR 1, 7.8). There was no difference in the distribution of  
287 women with only *Lactobacillus spp.* in the UGT versus non-*Lactobacillus* species  
288 between the surgical indications. (data not shown)

289

### 290 **Comment**

291 We detected UGT bacteria by PCR in 95% of women undergoing hysterectomy for  
292 benign gynecologic conditions. These results confirm the growing consensus that the  
293 endometrial cavity is not sterile. However, the quantity of bacteria present in the uterus  
294 and high endocervix was significantly lower than that in the vagina, suggesting that  
295 either the cervix serves as a partial filter to ascent, or that the endometrial immune  
296 response clears bacteria that do ascend, or a combination of both. We found a much  
297 higher prevalence of UGT colonization, but less correlation between vaginal and UGT  
298 samples than we anticipated. In women with vaginal colonization by a given species,

299 rates of UGT colonization varied widely, suggesting differences in microbial ability to  
300 evade cervical immunity, or greater permissiveness to some species. Many groups  
301 have shown that the vaginal microbial community is dynamic.<sup>27,29</sup> Our results suggest  
302 that microbes may remain in the UGT after they disappear from the vagina and/or have  
303 better growth in the UGT than the vagina.

304

305 Studies using a similar strategy of incising a hysterectomy specimen to collect samples,  
306 but using culture to identify bacterial colonization, report rates of intrauterine bacterial  
307 colonization ranging from 0% among 10 women from Finland<sup>22</sup> to 31% in a cohort of  
308 100 women from England.<sup>16</sup> Studies using transcervical sampling report higher rates of  
309 intrauterine bacterial colonization, ranging from 33%<sup>18</sup> to 60%,<sup>17</sup> but the degree of  
310 cervical or vaginal contamination of the endometrial specimen is unknown.<sup>30</sup> Our qPCR  
311 results from surgically obtained samples suggest an even higher rate of low-level  
312 bacterial presence in the upper genital tract than culture-based studies using  
313 transcervical sampling. Many of the bacteria identified by qPCR in this study, such as  
314 BVAB1-3 and *Leptotrichia/Sneathia*, are fastidious and difficult to culture, which may  
315 account for the differences between our data and previous reports. The bacteria we  
316 identified by culture from a subset of women include several taxa that have been  
317 identified in vaginal communities but were not targeted by our PCR assays:  
318 *Corynebacteria (Diphtheroids)*, *Propionibacteria*, *Ureaplasma*, coagulase-negative  
319 *Staphylococcus*, as well as several anaerobic colonies that could represent any number  
320 of other common vaginal species. All women in this study received pre-operative  
321 antibiotics intravenously, which likely affected our culture results.

322

323 Surprisingly, we saw few differences in endometrial immune markers between women  
324 with and without upper genital tract colonization by BV-associated microbes. This could  
325 be due to trauma-induced cytokine release at the time of surgical removal of the tissue,  
326 but our median values are similar to reported median values from endometrial aspirates  
327 in women with intact uteri undergoing in-vitro fertilization procedures<sup>31</sup> suggesting this is  
328 not the case. Alternatively, cytokines may be impacted by hormonal status, the  
329 underlying pathology leading to hysterectomy, or by viral or fungal pathogens not  
330 measured in our study. Our data suggest that a low quantity of upper genital tract  
331 bacterial colonization by common vaginal species does not induce a strong  
332 inflammatory stimulus in most cases.

333

334 This is an exploratory analysis with a small sample size, which limits our ability to detect  
335 small associations or to perform well-powered subgroup analyses to look at factors  
336 associated with UGT colonization for different species. However, it is the first study  
337 using molecular methods to assess upper genital tract colonization in non-pregnant  
338 women. Our analysis is cross-sectional, which limits our ability to make conclusions  
339 about causation or direction of associations. However, opportunities to sterilely collect  
340 endometrial samples with minimal risk of contamination from the lower genital tract are  
341 becoming scarce, and preclude longitudinal sample collection from the UGT. Changing  
342 patterns of surgery mean that fewer hysterectomies are being performed, and many are  
343 now performed use minimally invasive techniques where an intracervical manipulation  
344 device is used. Intracervical instrumentation could introduce an uncontrolled amount of



345 endometrial contamination, so these cases were excluded. Another limitation of our  
346 study is the use of selective qPCRs, which do not capture the entire microbiota.  
347 However, we did not have sufficient concentrations of bacterial DNA to perform broad  
348 range bacterial PCR with pyrosequencing. We did obtain additional information using  
349 bacterial culture in some cases, but prophylactic antibiotics potentially impact the  
350 sensitivity of cultures, and culture is not able to identify fastidious bacterial species.  
351 Finally, since these samples were collected from surgical specimens, all participants  
352 had pathology and thus the study population may not reflect the conditions present in  
353 normal, healthy women.

354

355 Recent advances in our understanding of the human microbiome reveals the important  
356 role that microbes play in many facets of human health.<sup>32</sup> The microbiome plays an  
357 important role in the immunologic homeostasis of the gut, encouraging proper  
358 development of mucosal immunity and preventing excessive inflammation (reviewed in  
359 <sup>33</sup>). T-regulatory cells in the gut mucosa maintain a tolerogenic environment and appear  
360 to be selected by interactions with commensal gut microbiota.<sup>34</sup> In the uterus, T-  
361 regulatory cells are important for implantation of the embryo and early placental  
362 development.<sup>35,36</sup> In one study, the presence of hydrogen peroxide producing  
363 *Lactobacillus* species on the tip of the embryo transfer catheter for in-vitro fertilization  
364 increased the chance of live birth compared to women who did not have these bacteria  
365 detected by culture.<sup>37</sup> This finding raises the possibility that the presence of intrauterine  
366 commensal bacteria may have a similar role in the selection of uterine T-regulatory cells  
367 as commensal gut microbiota do for colonic T-regulatory cells. While many other

368 factors contribute to a successful pregnancy, it is worth noting that germ-free mice  
369 raised in sterile conditions have lower rates of reproductive success after embryo  
370 transfer than conventional animals,<sup>38</sup> suggesting a potential role for intrauterine bacteria  
371 in successful pregnancy. This potentially critical issue is largely unexplored.

372

373 It is clear that intrauterine bacterial colonization is not always benign, nor positive. In  
374 patients undergoing in vitro fertilization cycles, the presence of *Streptococcus viridans*  
375 on the embryo transfer catheter tip was associated with decreased chance of live birth  
376 compared to women without *S. viridans* detected.<sup>37</sup> Women with preterm birth are more  
377 likely to have intra-uterine placental infection than women who deliver at term.

378 (reviewed in <sup>39</sup>) Women with significant inflammatory sequelae in the upper genital tract  
379 with pelvic inflammatory disease often have anaerobic Gram-negative rods and mixed  
380 communities of bacteria in the uterus and fallopian tubes.<sup>3,40</sup> Pathologic effects of  
381 intrauterine bacteria may occur only with particularly virulent strains or species, only  
382 with high concentrations of bacteria, or only in the presence of a mixed bacterial  
383 community at the endometrial surface.

384

385 In summary, these data indicate that the endometrial cavity is not sterile in most women  
386 undergoing hysterectomy for benign indications. Additionally, detection of bacteria in  
387 the upper genital tract is not associated with a significant inflammatory immune  
388 response. While bacterial concentrations in the endometrium are much lower than that  
389 in the vagina, a low-level bacterial presence in the uterus appears common and not  
390 pathologic.

391 **Acknowledgment:** The authors would like to acknowledge Xuezhou Hou, who  
392 developed the *Prevotella* genus assay in Dr. Fredricks' laboratory at the Fred  
393 Hutchinson Cancer Research Institute, as well as the surgeons in the Gynecology  
394 Division at the University of Washington who facilitated collection of specimens.

ACCEPTED MANUSCRIPT

## References

1. Hillier SL, Nugent RP, Eschenbach DA, et al. Association between bacterial vaginosis and preterm delivery of a low-birth-weight infant. The Vaginal Infections and Prematurity Study Group. *The New England journal of medicine*. Dec 28 1995;333(26):1737-1742.
2. Taylor BD, Darville T, Haggerty CL. Does bacterial vaginosis cause pelvic inflammatory disease? *Sexually transmitted diseases*. Feb 2013;40(2):117-122.
3. Hillier SL, Kiviat NB, Hawes SE, et al. Role of bacterial vaginosis-associated microorganisms in endometritis. *American journal of obstetrics and gynecology*. Aug 1996;175(2):435-441.
4. Nelson DB, Bellamy S, Nachamkin I, Ness RB, Macones GA, Allen-Taylor L. First trimester bacterial vaginosis, individual microorganism levels, and risk of second trimester pregnancy loss among urban women. *Fertility and sterility*. Nov 2007;88(5):1396-1403.
5. Ulcova-Gallova Z. Immunological and physicochemical properties of cervical ovulatory mucus. *Journal of reproductive immunology*. Nov 2010;86(2):115-121.
6. Lieberman JA, Moscicki AB, Sumerel JL, Ma Y, Scott ME. Determination of cytokine protein levels in cervical mucus samples from young women by a multiplex immunoassay method and assessment of correlates. *Clin Vaccine Immunol*. Jan 2008;15(1):49-54.
7. Ming L, Xiaoling P, Yan L, et al. Purification of antimicrobial factors from human cervical mucus. *Human reproduction (Oxford, England)*. Jul 2007;22(7):1810-1815.
8. Hein M, Helmig RB, Schonheyder HC, Ganz T, Uldbjerg N. An in vitro study of antibacterial properties of the cervical mucus plug in pregnancy. *American journal of obstetrics and gynecology*. Sep 2001;185(3):586-592.
9. Hein M, Valore EV, Helmig RB, Uldbjerg N, Ganz T. Antimicrobial factors in the cervical mucus plug. *American journal of obstetrics and gynecology*. Jul 2002;187(1):137-144.

10. Hein M, Petersen AC, Helmig RB, Uldbjerg N, Reinholdt J. Immunoglobulin levels and phagocytes in the cervical mucus plug at term of pregnancy. *Acta obstetrica et gynecologica Scandinavica*. Aug 2005;84(8):734-742.
11. Becher N, Hein M, Danielsen CC, Uldbjerg N. Matrix metalloproteinases in the cervical mucus plug in relation to gestational age, plug compartment, and preterm labor. *Reprod Biol Endocrinol*. 2010;8:113.
12. Zervomanolakis I, Ott HW, Hadziomerovic D, et al. Physiology of upward transport in the human female genital tract. *Annals of the New York Academy of Sciences*. Apr 2007;1101:1-20.
13. Ansbacher R, Boyson WA, Morris JA. Sterility of the uterine cavity. *American journal of obstetrics and gynecology*. Oct 1 1967;99(3):394-396.
14. Spore WW, Moskal PA, Nakamura RM, Mishell DR, Jr. Bacteriology of postpartum oviducts and endometrium. *American journal of obstetrics and gynecology*. Jun 15 1970;107(4):572-577.
15. Moller BR, Kristiansen FV, Thorsen P, Frost L, Mogensen SC. Sterility of the uterine cavity. *Acta obstetrica et gynecologica Scandinavica*. Mar 1995;74(3):216-219.
16. Cowling P, McCoy DR, Marshall RJ, Padfield CJ, Reeves DS. Bacterial colonization of the non-pregnant uterus: a study of pre-menopausal abdominal hysterectomy specimens. *Eur J Clin Microbiol Infect Dis*. Feb 1992;11(2):204-205.
17. Bollinger CC. Bacterial Flora of the Nonpregnant Uterus: A New Culture Technic. *Obstetrics and gynecology*. Feb 1964;23:251-255.
18. Hemsell DL, Obregon VL, Heard MC, Nobles BJ. Endometrial bacteria in asymptomatic, nonpregnant women. *The Journal of reproductive medicine*. Nov 1989;34(11):872-874.
19. Mishell DR, Jr., Bell JH, Good RG, Moyer DL. The intrauterine device: a bacteriologic study of the endometrial cavity. *American journal of obstetrics and gynecology*. Sep 1 1966;96(1):119-126.

20. Sparks RA, Purrier BG, Watt PJ, Elstein M. The bacteriology of the cervix and uterus. *Br J Obstet Gynaecol*. Sep 1977;84(9):701-704.
21. Andrews WW, Hauth JC, Cliver SP, Conner MG, Goldenberg RL, Goepfert AR. Association of asymptomatic bacterial vaginosis with endometrial microbial colonization and plasma cell endometritis in nonpregnant women. *American journal of obstetrics and gynecology*. Dec 2006;195(6):1611-1616.
22. Teisala K. Endometrial microbial flora of hysterectomy specimens. *European journal of obstetrics, gynecology, and reproductive biology*. Oct 1987;26(2):151-155.
23. Tremaroli V, Backhed F. Functional interactions between the gut microbiota and host metabolism. *Nature*. Sep 13 2012;489(7415):242-249.
24. Consortium THMP. Structure, function and diversity of the healthy human microbiome. *Nature*. Jun 14 2012;486(7402):207-214.
25. Nugent RP, Krohn MA, Hillier SL. Reliability of diagnosing bacterial vaginosis is improved by a standardized method of gram stain interpretation. *Journal of clinical microbiology*. Feb 1991;29(2):297-301.
26. Fredricks DN, Fiedler TL, Thomas KK, Mitchell CM, Marrazzo JM. Changes in Vaginal Bacterial Concentrations with Intravaginal Metronidazole Therapy for Bacterial Vaginosis as Assessed by Quantitative PCR. *Journal of clinical microbiology*. Jan 14 2009.
27. Srinivasan S, Liu C, Mitchell CM, et al. Temporal variability of human vaginal bacteria and relationship with bacterial vaginosis. *PLoS One*. 2010;5(4):e10197.
28. Srinivasan S, Hoffman NG, Morgan MT, et al. Bacterial communities in women with bacterial vaginosis: high resolution phylogenetic analyses reveal relationships of microbiota to clinical criteria. *PLoS One*. 2012;7(6):e37818.
29. Gajer P, Brotman RM, Bai G, et al. Temporal dynamics of the human vaginal microbiota. *Sci Transl Med*. May 2 2012;4(132):132ra152.

30. Eschenbach DA, Rosene K, Tompkins LS, Watkins H, Gravett MG. Endometrial cultures obtained by a triple-lumen method from afebrile and febrile postpartum women. *The Journal of infectious diseases*. Jun 1986;153(6):1038-1045.
31. Boomsma CM, Kavelaars A, Eijkemans MJ, et al. Endometrial secretion analysis identifies a cytokine profile predictive of pregnancy in IVF. *Human reproduction (Oxford, England)*. Jun 2009;24(6):1427-1435.
32. Relman DA. Microbiology: Learning about who we are. *Nature*. Jun 14 2012;486(7402):194-195.
33. Hooper LV, Littman DR, Macpherson AJ. Interactions between the microbiota and the immune system. *Science (New York, N.Y.)*. Jun 8 2012;336(6086):1268-1273.
34. Lathrop SK, Bloom SM, Rao SM, et al. Peripheral education of the immune system by colonic commensal microbiota. *Nature*. Oct 13 2011;478(7368):250-254.
35. Shima T, Sasaki Y, Itoh M, et al. Regulatory T cells are necessary for implantation and maintenance of early pregnancy but not late pregnancy in allogeneic mice. *Journal of reproductive immunology*. Jun 2010;85(2):121-129.
36. Zhou J, Wang Z, Zhao X, Wang J, Sun H, Hu Y. An increase of Treg cells in the peripheral blood is associated with a better in vitro fertilization treatment outcome. *Am J Reprod Immunol*. Aug 2012;68(2):100-106.
37. Moore DE, Soules MR, Klein NA, Fujimoto VY, Agnew KJ, Eschenbach DA. Bacteria in the transfer catheter tip influence the live-birth rate after in vitro fertilization. *Fertility and sterility*. Dec 2000;74(6):1118-1124.
38. Inzunza J, Midtvedt T, Fartoo M, et al. Germfree status of mice obtained by embryo transfer in an isolator environment. *Lab Anim*. Oct 2005;39(4):421-427.
39. Goldenberg RL, Hauth JC, Andrews WW. Intrauterine infection and preterm delivery. *The New England journal of medicine*. May 18 2000;342(20):1500-1507.

40. Kiviat NB, Wolner-Hanssen P, Eschenbach DA, et al. Endometrial histopathology in patients with culture-proved upper genital tract infection and laparoscopically diagnosed acute salpingitis. *Am J Surg Pathol*. Feb 1990;14(2):167-175.

ACCEPTED MANUSCRIPT



## Figure Legends

**Figure 1: Distribution of upper genital tract bacterial colonization.** A. Proportion of participants with detection of bacteria by species-specific qPCR in the vagina alone, both vagina and upper genital tract (UGT) and UGT alone. B. Comparison of mean quantity of bacteria in the vagina and UGT of women with either vaginal or upper genital tract detection of that species. \* denotes comparisons that are significantly different ( $p < 0.05$ ) by t-test. C. Proportion of women with vaginal detection of a given species by qPCR who also had UGT detection of that species.

**Figure 2: Comparison of vaginal and upper genital tract detection of bacteria.**

Detection and quantity of each species in the vagina and UGT for each participant, organized by Nugent score. Each bacterium is represented by a row, and the quantity is represented by a gradient of color, with darker colors representing higher quantities. The color gradients represent grouping of 1-100, 101-10,000, 10,000 – 1,000,000 and  $> 1,000,000$  16S rRNA gene copies/swab. A white space means that the bacterium was not detected in that sample.

**Figure 3: Endometrial immune markers.** Comparison of markers of the immune response in the upper genital tract between women with no bacteria detected by PCR in the upper genital tract, only *Lactobacillus* species detected, or any non-*Lactobacillus* species detected. Numbers in boxes are multiple of the median, calculated by taking the median value for the whole cohort and dividing the individual group value by that

number. There were no significant differences between these three groups. Values highlighted in red are higher than the group median, and those in blue are lower than the group median.

ACCEPTED MANUSCRIPT

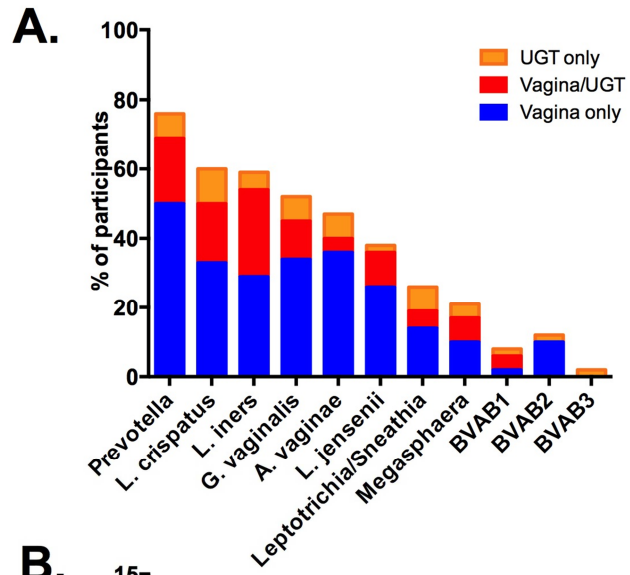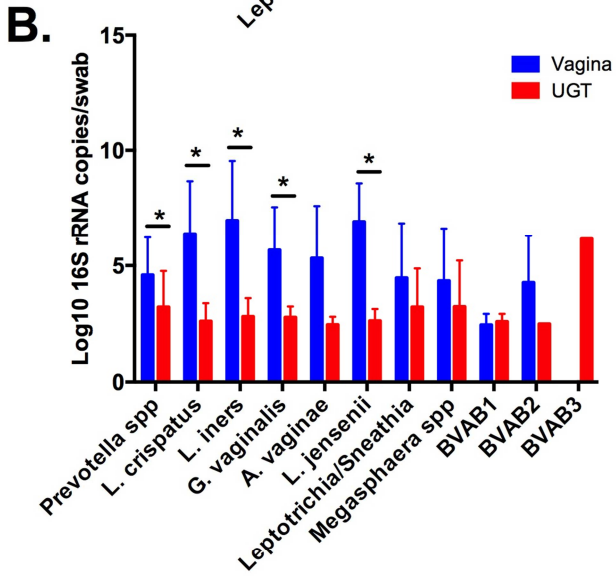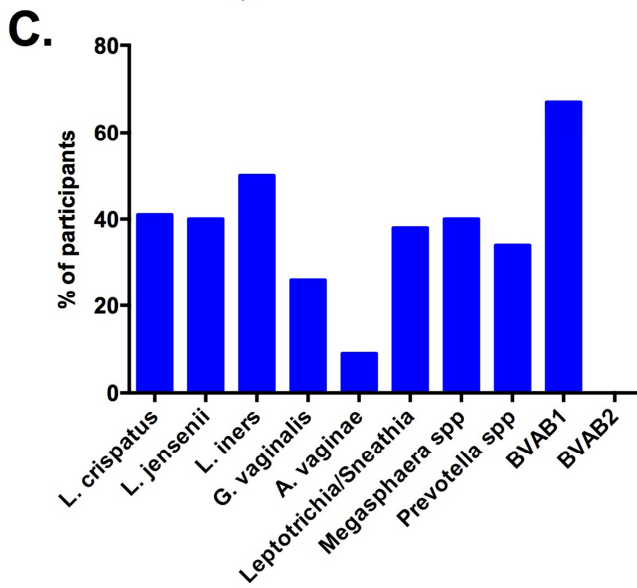

Supplemental Table 1: Comparison of qPCR and culture results of women who had both assays completed. Unless otherwise noted, all bacteria detected by culture were present at low levels ( $< 10^2$  cfu/swab)

|      | UGT culture                                                                                                                | UGT qPCR                                                                  |
|------|----------------------------------------------------------------------------------------------------------------------------|---------------------------------------------------------------------------|
| 1015 | <i>Diphtheroids</i>                                                                                                        | <i>L. iners</i><br><i>Prevotella spp</i>                                  |
| 1016 | --                                                                                                                         | <i>L. crispatus</i><br><i>L. iners</i><br>16S                             |
| 1017 | Coagulase negative staphylococcus<br>Anaerobic GPC                                                                         | <i>L. iners</i><br><i>Prevotella spp.</i><br><i>Leptotrichia/Sneathia</i> |
| 1018 | Viridans streptococcus ( $2 \times 10^2$ ),<br><i>Lactobacillus spp</i><br>Anaerobic GPC                                   | <i>L. iners</i><br>16S                                                    |
| 1026 | Coagulase negative staphylococcus<br><i>Diphtheroids</i><br><i>Propionibacterium spp</i><br>Anaerobic GNR<br>Anaerobic GPC | <i>L. crispatus</i><br><i>Prevotella spp.</i><br>16S                      |
| 1028 | <i>Diphtheroids</i>                                                                                                        | <i>L. iners</i><br><i>Leptotrichia/Sneathia</i><br>16S                    |
| 1032 | <i>Propionibacterium spp</i><br>Coagulase negative staphylococcus                                                          | <i>L. iners</i>                                                           |
| 1033 | <i>Propionibacterium acnes</i>                                                                                             | <i>Prevotella spp</i><br>16S                                              |
| 1034 | --                                                                                                                         | --                                                                        |
| 1035 | Coagulase negative staphylococcus                                                                                          | <i>L. iners</i>                                                           |
| 1037 | --                                                                                                                         | <i>L. crispatus</i><br><i>Prevotella spp</i><br>16S                       |

|      |                                                                                                                                                                                                                     |                                                                                            |
|------|---------------------------------------------------------------------------------------------------------------------------------------------------------------------------------------------------------------------|--------------------------------------------------------------------------------------------|
| 1038 | <i>G. vaginalis</i> (10 <sup>5</sup> )<br><i>Lactobacillus</i> (2 spp, each 10 <sup>3</sup> )<br>Anaerobic GPC (10 <sup>2</sup> )                                                                                   | <i>G. vaginalis</i><br><i>Prevotella</i> spp                                               |
| 1044 | Coagulase negative staphylococcus                                                                                                                                                                                   | <i>L. crispatus</i><br><i>Leptotrichia/Sneathia</i><br><i>Prevotella</i> spp.<br>16S       |
| 1046 | Anaerobic GNR                                                                                                                                                                                                       | <i>L. jensenii</i><br>16S                                                                  |
| 1049 | <i>Propionibacterium acnes</i>                                                                                                                                                                                      | <i>A. vaginae</i><br><i>Leptotrichia/Sneathia</i><br><i>Prevotella</i> spp<br>BVAB1<br>16S |
| 1050 | <i>Diphtheroids</i> ,<br><i>Propionibacterium acnes</i>                                                                                                                                                             | <i>L. iners</i> ,<br><i>Leptotrichia/Sneathia</i><br><i>Prevotella</i> spp.                |
| 1053 | <i>Lactobacillus</i> spp #1(9 x 10 <sup>2</sup> ), <i>Lactobacillus</i> spp<br>#2 (10 <sup>3</sup> ),<br>Coagulase negative staphylococcus<br><i>Diphtheroids</i> ,<br><i>Lactobacillus</i> spp #3<br>Anaerobic GPC | <i>L. jensenii</i><br><i>L. iners</i><br><i>G. vaginalis</i><br>16S                        |
| 1054 | --                                                                                                                                                                                                                  | --                                                                                         |
| 1055 | <i>Lactobacillus</i> spp (2 x 10 <sup>2</sup> )<br>Anaerobic GPR (2spp)                                                                                                                                             | <i>Prevotella</i>                                                                          |
| 1056 | <i>Diphtheroids</i><br>Aerobic GPC                                                                                                                                                                                  | <i>L. crispatus</i> ,<br><i>Leptotrichia/Sneathia</i>                                      |
| 1057 | <i>Diphtheroids</i> (2 types)<br>Aerobic GPC                                                                                                                                                                        | <i>Leptotrichia/Sneathia</i>                                                               |
| 1060 | <i>E. coli</i><br>Coagulase negative staphylococcus<br><i>Diphtheroids</i>                                                                                                                                          | <i>L. iners</i><br><i>Prevotella</i> spp<br>16S                                            |

|      |                                                                                                                    |                                                                                                                                        |
|------|--------------------------------------------------------------------------------------------------------------------|----------------------------------------------------------------------------------------------------------------------------------------|
|      | Anaerobic GPC<br>Anaerobic GNR<br>Anaerobic GNC<br>Anaerobic GPR                                                   |                                                                                                                                        |
| 1061 | Proteus spp (presumptive mirabilis)<br>Diphtheroids                                                                | <i>L. jensenii</i><br><i>L. iners</i>                                                                                                  |
| 1062 | <i>Diphtheroids</i><br><i>Propionibacterium spp</i><br>Anaerobic GPR                                               | <i>L. crispatus</i><br><i>L. jensenii</i><br><i>L. iners</i><br><i>G. vaginalis</i><br>BVAB2                                           |
| 1064 | <i>Diphtheroids</i><br>Coagulase negative staphylococcus<br>Anaerobic GPC (3 isolates)                             | <i>G. vaginalis</i> ,<br><i>Megasphaera spp</i><br>16S                                                                                 |
| 1066 | Coagulase negative staphylococcus (2 isolates)<br>Anaerobic GNR,<br>Anaerobic GPC                                  | <i>L. crispatus</i>                                                                                                                    |
| 1067 | Anaerobic GPR<br><i>Lactobacillus spp</i><br><i>Diphtheroids</i>                                                   | <i>L. crispatus</i>                                                                                                                    |
| 1071 | Viridans streptococci,<br><i>Diphtheroids</i><br>Anaerobic GPC<br>Anaerobic GPR                                    | <i>Prevotella spp.</i><br>16S                                                                                                          |
| 1073 | <i>Diphtheroids</i><br><i>Propionibacterium spp (2 types)</i> ,<br><i>Propionibacterium acnes</i><br>Anaerobic GPC | <i>G. vaginalis</i> ,<br><i>A. vaginae</i> ,<br><i>Megasphaera spp</i><br><i>Leptotrichia/Sneathia</i><br><i>Prevotella spp</i><br>16S |
| 1075 | <i>Ureaplasma urealyticum</i>                                                                                      | 16S                                                                                                                                    |

GPC = Gram positive cocci; GNC = Gram negative cocci; GNR = Gram negative rods;

GPR = Gram positive rods
